# Supplementary material for: A composite lateral flow test substrate by capillary deposition of cellulose on synthetic paper
Source: Royal Society of Chemistry journal article supplement (doi:10.1039/d6ra01317a), 2026-06-03
Supplement: d6ra01317a1.pdf [file d6ra01317a1.pdf]

## Supporting Information

### **A composite lateral flow test substrate by capillary deposition of cellulose on synthetic paper**

Qinghao He<sup>1†</sup>, Jiahua Zhong<sup>1†</sup>, Haonan Li<sup>1</sup>, Xionghui Li<sup>1</sup>, Yixi Shi<sup>1</sup>, Muyang Zhang<sup>1</sup>, Jie Zhou<sup>1</sup>, Hao Chen<sup>1</sup>, Xinyi Chen<sup>1</sup>, Zhuoting Han<sup>2</sup>, Lok Ting Chu<sup>3</sup>, Huiru Zhang<sup>4\*</sup>, Weijin Guo<sup>1\*</sup>

<sup>1\*</sup>Department of Biomedical Engineering, Shantou University, Shantou, 515063, Guangdong, China.

<sup>2</sup> Department of Laboratory Medicine, The Second Affiliated Hospital of Guangdong Medical University, Zhanjiang, 524003, China.

<sup>3</sup> Institute of Biochemistry and Molecular Biology, Guangdong Medical University, Zhanjiang, 524023, Guangdong, China.

<sup>4\*</sup> Neusoft Institute Guangdong, Foshan, 528225, Guangdong, China.

\*Corresponding author(s). E-mail(s): [zhanghuirugd@foxmail.com](mailto:zhanghuirugd@foxmail.com); [guoweijin@stu.edu.cn](mailto:guoweijin@stu.edu.cn);

<sup>†</sup>These authors contributed equally to this work.

### Table of Content

|                |   |
|----------------|---|
| Figure S1..... | 2 |
| Figure S2..... | 3 |
| Figure S3..... | 4 |
| Figure S4..... | 5 |
| Figure S5..... | 6 |
| Figure S6..... | 7 |

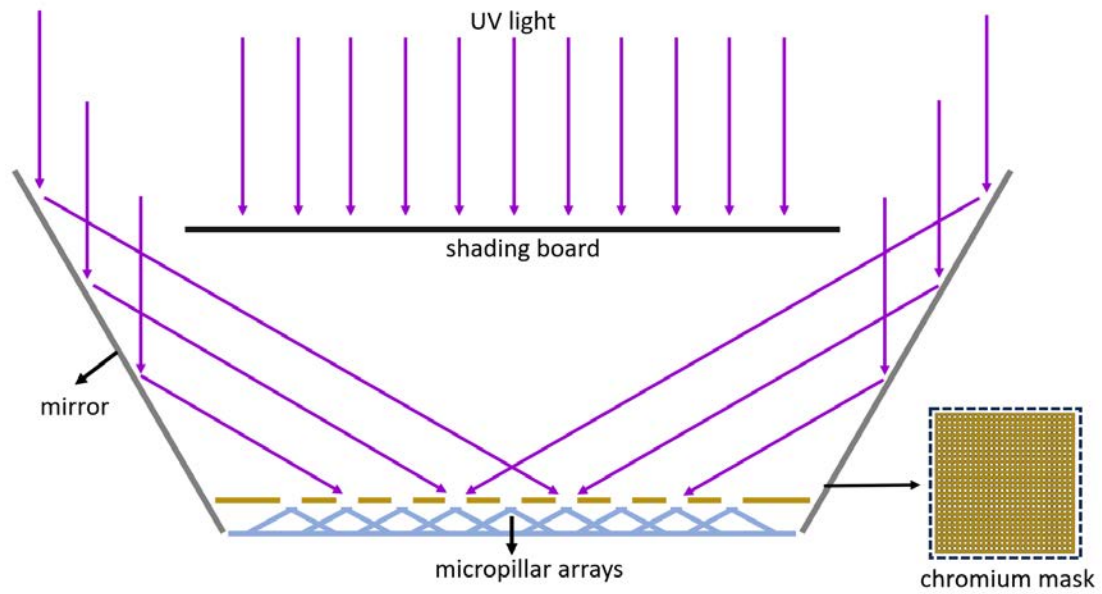

**Figure S1** The fabrication of micropillar array. The angle of tilted aluminium mirror is  $75^\circ$ . The shading board blocks the UV light. The UV light is reflected by the mirror. The OSTE is lithographed through the chromium mask and forms the micropillar array.

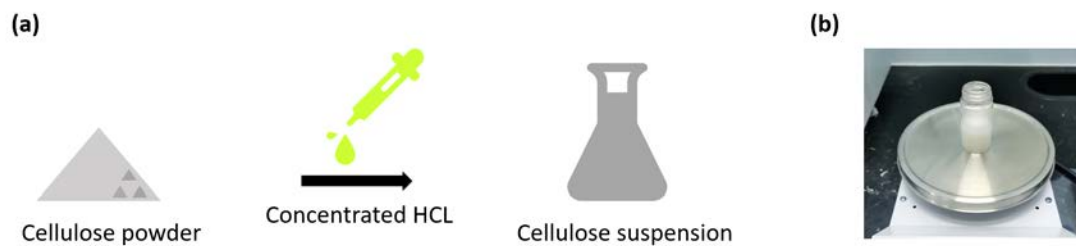

**Figure S2** Cellulose dissolution. Cellulose is treated with concentrated hydrochloric acid. 10 mL 37 % hydrochloric acid is poured into 1 g microcrystalline cellulose. We stir the mixture at room temperature for 2 hours. Then, we use DI water for dialysis until the pH value changes to 7.0. The neutral cellulose suspension is poured into a glass bottle for storage before use.

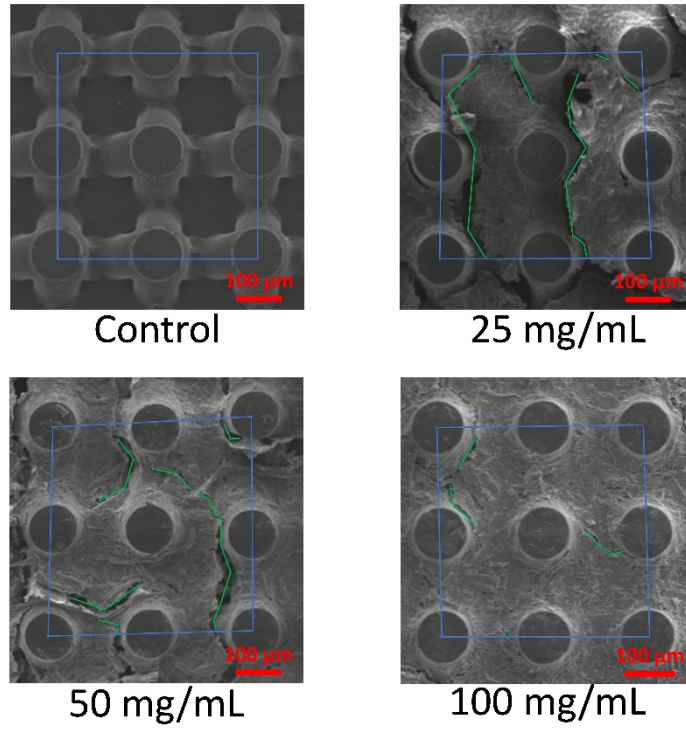

**Figure S3** The average crack lengths are 0 (control), 1077.87  $\mu\text{m}$ , 896.89  $\mu\text{m}$  and 303.48  $\mu\text{m}$  respectively.

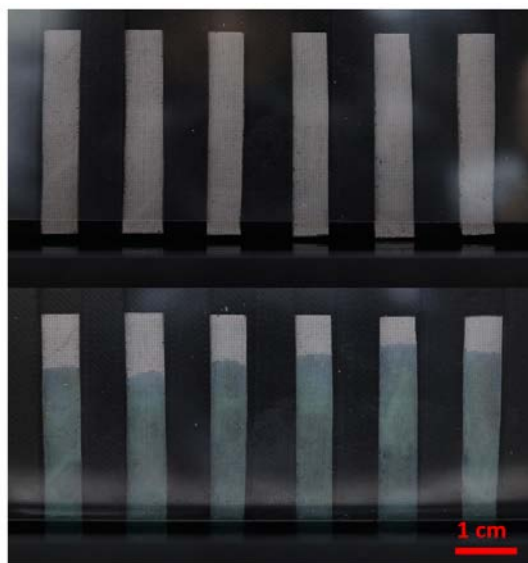

**Figure S4** The pictures of test strips before and after green water flows on them.

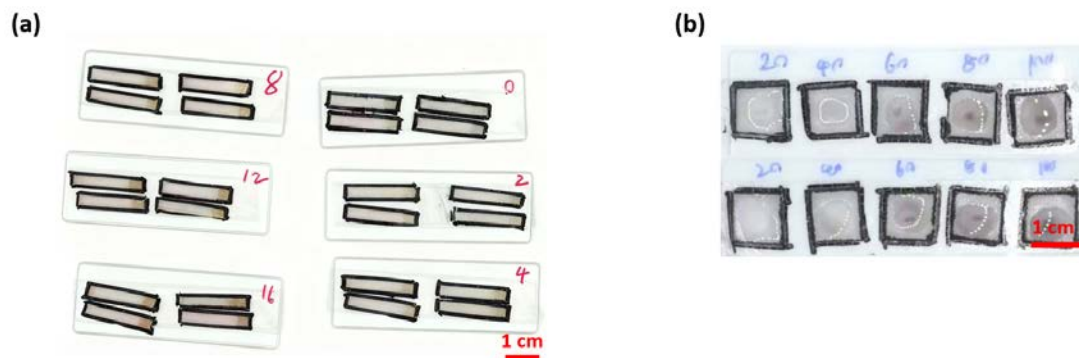

**Figure S5** Detection of urine glucose and iodate. (a) shows different brown depositions under different concentrations of urine glucose (0 mM, 2 mM, 4 mM, 8 mM, 12 mM and 16 mM). (b) shows different blue-purple depositions under different concentrations of iodate (20 mg/mL, 40 mg/mL, 60 mg/mL, 80 mg/mL and 100 mg/mL).

### Plasma separation on nitrocellulose membrane

By implementing the same agglutination-based plasma separation strategy, plasma separation experiments are done on the commercial nitrocellulose membrane (NC140C, Cobetter) as a control experiment. The plasma on the nitrocellulose membrane isn't completely separated, and blood cells even spread from the reaction zone into the plasma channel (Figure S6(b)).

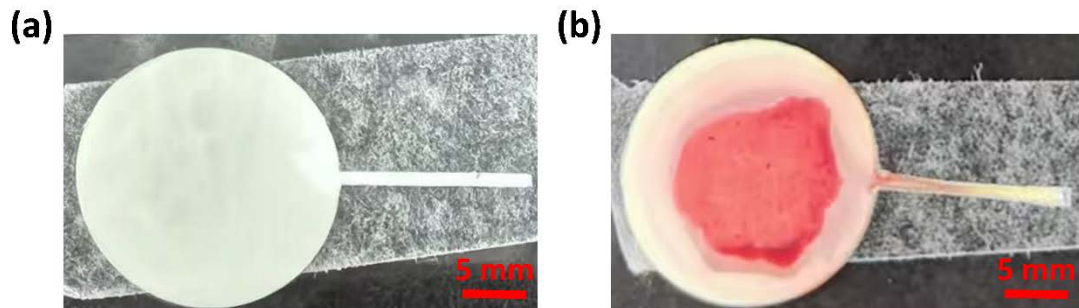

**Figure S6** Plasma separation on nitrocellulose membrane: a test strip by nitrocellulose membrane before (a) and after (b) adding whole blood
